# Supplementary material for: Clinical Usefulness of a Short Version of the Internet Addiction Test to Screen for Probable Internet Addiction in Adolescents with Autism Spectrum Disorder
Source: MDPI journal article supplement (doi:10.3390/ijerph20054670), 2023-03-06
Supplement: s1 [file s1]

**Table S1.** Detailed results of this study.

| No | Age | Gender | IA status    | IAT | s-IAT |
|----|-----|--------|--------------|-----|-------|
| 1  | 16  | F      | Addicted     | 73  | 45    |
| 2  | 14  | M      | Addicted     | 71  | 48    |
| 3  | 12  | M      | Addicted     | 68  | 46    |
| 4  | 14  | M      | Addicted     | 65  | 39    |
| 5  | 13  | M      | Addicted     | 65  | 38    |
| 6  | 14  | M      | Addicted     | 62  | 35    |
| 7  | 15  | F      | Addicted     | 61  | 35    |
| 8  | 17  | M      | Addicted     | 60  | 39    |
| 9  | 12  | M      | Addicted     | 59  | 41    |
| 10 | 18  | M      | Addicted     | 54  | 35    |
| 11 | 14  | F      | Addicted     | 47  | 28    |
| 12 | 14  | F      | Addicted     | 44  | 29    |
| 13 | 13  | M      | Addicted     | 38  | 23    |
| 14 | 11  | F      | Addicted     | 28  | 16    |
| 15 | 14  | F      | Non-addicted | 64  | 40    |
| 16 | 11  | F      | Non-addicted | 63  | 40    |
| 17 | 15  | M      | Non-addicted | 60  | 37    |
| 18 | 10  | M      | Non-addicted | 60  | 33    |
| 19 | 17  | F      | Non-addicted | 59  | 37    |
| 20 | 13  | M      | Non-addicted | 59  | 37    |
| 21 | 12  | M      | Non-addicted | 58  | 34    |
| 22 | 16  | M      | Non-addicted | 58  | 34    |
| 23 | 11  | M      | Non-addicted | 57  | 36    |
| 24 | 13  | M      | Non-addicted | 56  | 36    |
| 25 | 11  | M      | Non-addicted | 56  | 35    |
| 26 | 18  | M      | Non-addicted | 56  | 33    |
| 27 | 18  | M      | Non-addicted | 56  | 32    |
| 28 | 13  | M      | Non-addicted | 54  | 38    |
| 29 | 15  | M      | Non-addicted | 54  | 31    |
| 30 | 18  | M      | Non-addicted | 53  | 35    |
| 31 | 11  | M      | Non-addicted | 53  | 34    |
| 32 | 17  | M      | Non-addicted | 53  | 33    |
| 33 | 14  | M      | Non-addicted | 53  | 29    |
| 34 | 17  | M      | Non-addicted | 51  | 32    |
| 35 | 18  | M      | Non-addicted | 51  | 30    |

|    |    |   |              |    |    |
|----|----|---|--------------|----|----|
| 36 | 14 | F | Non-addicted | 51 | 30 |
| 37 | 17 | M | Non-addicted | 50 | 35 |
| 38 | 14 | M | Non-addicted | 50 | 31 |
| 39 | 12 | M | Non-addicted | 50 | 30 |
| 40 | 15 | M | Non-addicted | 49 | 31 |
| 41 | 18 | F | Non-addicted | 49 | 29 |
| 42 | 17 | F | Non-addicted | 49 | 28 |
| 43 | 17 | F | Non-addicted | 49 | 27 |
| 44 | 17 | M | Non-addicted | 48 | 30 |
| 45 | 11 | M | Non-addicted | 48 | 24 |
| 46 | 16 | M | Non-addicted | 47 | 36 |
| 47 | 13 | M | Non-addicted | 47 | 27 |
| 48 | 14 | M | Non-addicted | 46 | 33 |
| 49 | 11 | M | Non-addicted | 46 | 30 |
| 50 | 13 | F | Non-addicted | 46 | 29 |
| 51 | 10 | M | Non-addicted | 45 | 32 |
| 52 | 18 | M | Non-addicted | 45 | 28 |
| 53 | 11 | M | Non-addicted | 45 | 25 |
| 54 | 12 | M | Non-addicted | 44 | 33 |
| 55 | 15 | M | Non-addicted | 44 | 28 |
| 56 | 18 | F | Non-addicted | 43 | 26 |
| 57 | 13 | M | Non-addicted | 42 | 28 |
| 58 | 12 | M | Non-addicted | 42 | 25 |
| 59 | 12 | M | Non-addicted | 41 | 27 |
| 60 | 18 | M | Non-addicted | 41 | 24 |
| 61 | 14 | M | Non-addicted | 40 | 27 |
| 62 | 16 | M | Non-addicted | 40 | 24 |
| 63 | 14 | F | Non-addicted | 39 | 29 |
| 64 | 13 | F | Non-addicted | 39 | 29 |
| 65 | 13 | M | Non-addicted | 39 | 25 |
| 66 | 18 | M | Non-addicted | 39 | 22 |
| 67 | 11 | M | Non-addicted | 38 | 28 |
| 68 | 16 | M | Non-addicted | 38 | 27 |
| 69 | 12 | M | Non-addicted | 38 | 25 |
| 70 | 12 | M | Non-addicted | 38 | 23 |
| 71 | 15 | M | Non-addicted | 37 | 26 |
| 72 | 13 | M | Non-addicted | 37 | 24 |
| 73 | 10 | M | Non-addicted | 36 | 22 |
| 74 | 18 | M | Non-addicted | 36 | 22 |
| 75 | 15 | M | Non-addicted | 35 | 18 |
| 76 | 11 | M | Non-addicted | 33 | 25 |

|     |    |   |              |    |    |
|-----|----|---|--------------|----|----|
| 77  | 13 | F | Non-addicted | 33 | 24 |
| 78  | 18 | M | Non-addicted | 33 | 20 |
| 79  | 12 | M | Non-addicted | 33 | 19 |
| 80  | 18 | M | Non-addicted | 33 | 19 |
| 81  | 14 | M | Non-addicted | 31 | 21 |
| 82  | 15 | M | Non-addicted | 31 | 21 |
| 83  | 11 | M | Non-addicted | 31 | 21 |
| 84  | 15 | M | Non-addicted | 31 | 20 |
| 85  | 15 | F | Non-addicted | 31 | 18 |
| 86  | 14 | F | Non-addicted | 31 | 15 |
| 87  | 17 | M | Non-addicted | 30 | 20 |
| 88  | 12 | F | Non-addicted | 30 | 20 |
| 89  | 12 | M | Non-addicted | 30 | 19 |
| 90  | 15 | M | Non-addicted | 30 | 17 |
| 91  | 16 | F | Non-addicted | 28 | 19 |
| 92  | 16 | M | Non-addicted | 28 | 18 |
| 93  | 16 | M | Non-addicted | 28 | 18 |
| 94  | 14 | M | Non-addicted | 28 | 17 |
| 95  | 15 | M | Non-addicted | 28 | 17 |
| 96  | 18 | F | Non-addicted | 26 | 18 |
| 97  | 14 | M | Non-addicted | 26 | 17 |
| 98  | 14 | M | Non-addicted | 26 | 16 |
| 99  | 18 | M | Non-addicted | 26 | 14 |
| 100 | 17 | M | Non-addicted | 25 | 17 |
| 101 | 10 | F | Non-addicted | 25 | 15 |
| 102 | 18 | M | Non-addicted | 24 | 16 |
| 103 | 14 | F | Non-addicted | 24 | 16 |
| 104 | 17 | M | Non-addicted | 24 | 14 |

M: Male, F: Female, IA: Internet addiction, IAT: Internet Addiction Test, s-IAT: The short version of Internet Addiction Test.
